# Supplementary material
Source: Research Square preprint supplement (doi:10.21203/rs.3.rs-8927304/v1)
Supplement: Supplementary file 1 [file 1168d5ed1eff0d20d814cc19.pdf]

Supplementary figure 1a, Overview of surgical recurrence rates

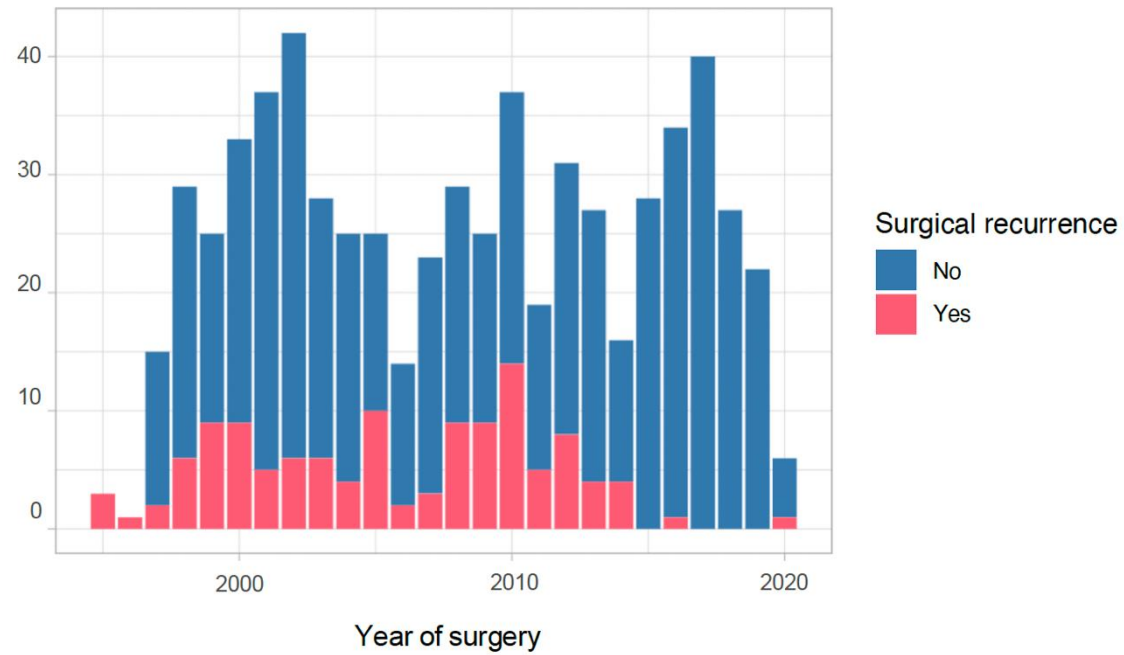

Supplementary figure 1b, Overview of surgical approach

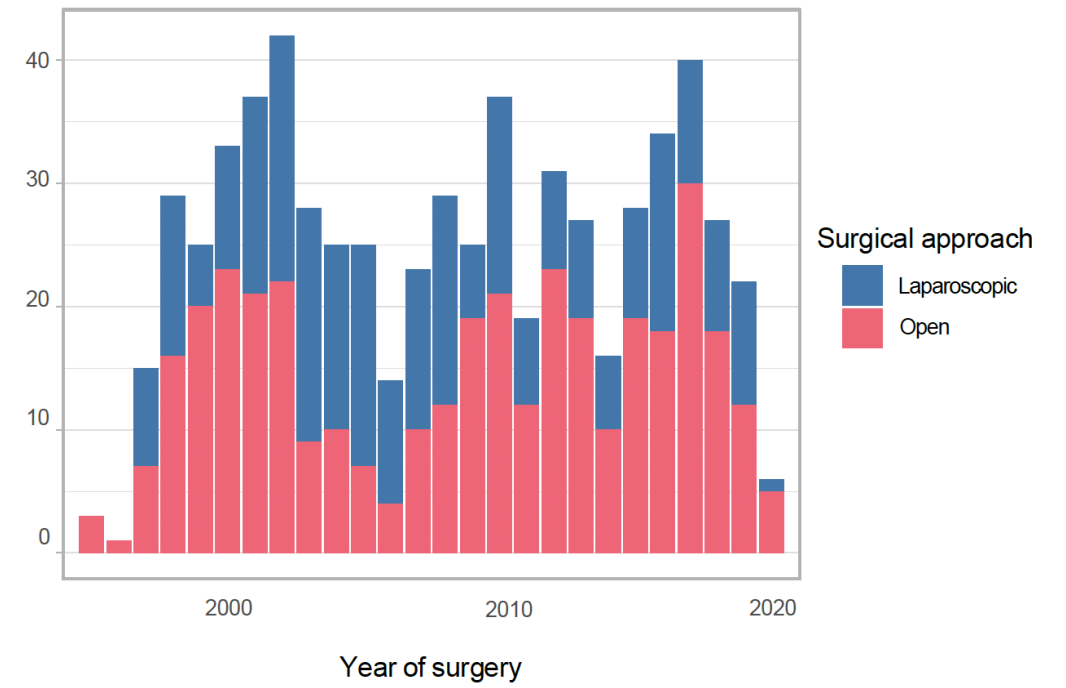

Supplementary figure 1. Overview of surgical approach and surgical recurrence over the observational period
