# Supplementary material
Source: Research Square preprint supplement (doi:10.21203/rs.3.rs-8927304/v1)
Supplement: Supplementary file 2 [file 16405433f13b774e8395a174.pdf]

# Laparoscopic surgery is associated with reduced long-term reoperation risk in Crohn's disease

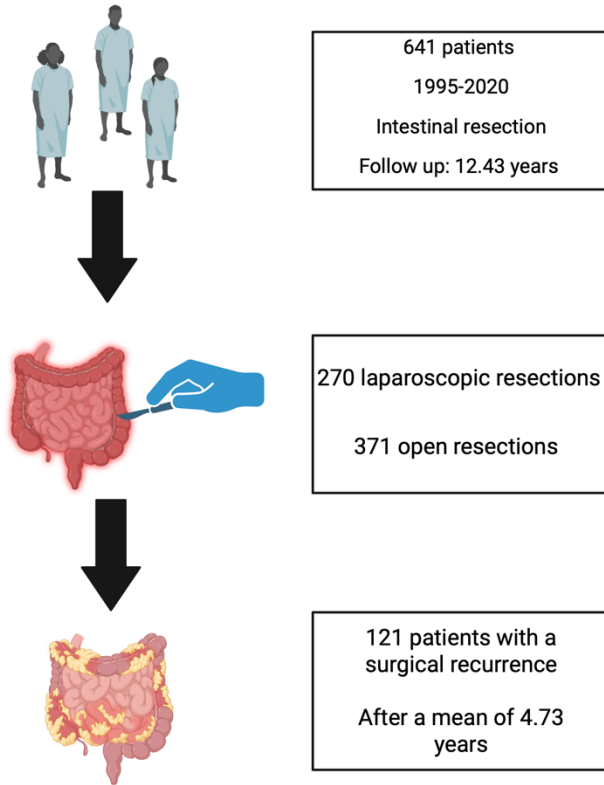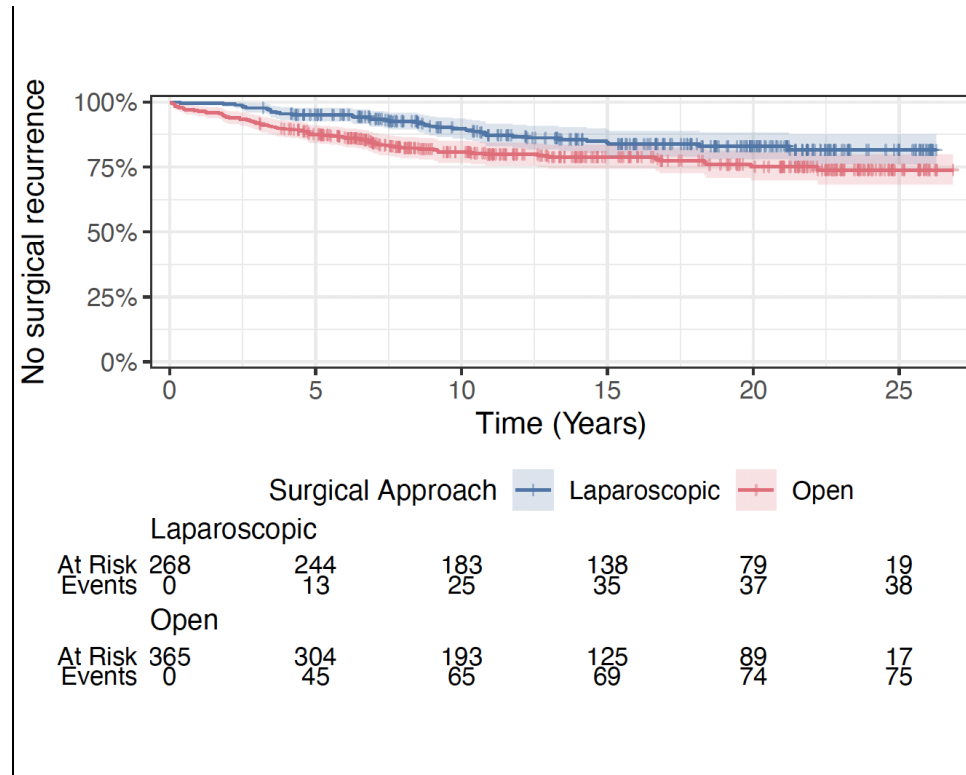

## FACTORS ASSOCIATED WITH SURGICAL RECURRENCE

Open surgery (HR 1.75, 95% CI 1.14–2.69;  $p=0.009$ )

Microscopical signs of inflammation at the resection margins (HR 1.57, 95% CI 1.07–2.30;  $p=0.020$ )

Non-Smokers (HR 0.66, 95% CI 0.45–0.96;  $p=0.029$ )

## CONCLUSION

Minimally invasive surgery was associated with lower long-term surgical recurrence in Crohn's disease and may represent a potentially modifiable factor in optimising surgical outcomes.
