# Supplementary material
Source: Research Square preprint supplement (doi:10.21203/rs.3.rs-8927304/v1)
Supplement: Supplementary file 3 [file 3f7f303c55064dcbf8e8efeb.pdf]

|                                                          | ALL PATIENTS      | CDC               |                   |
|----------------------------------------------------------|-------------------|-------------------|-------------------|
|                                                          | n = 641           | CDC ≤2<br>n=596   | CDC > 2<br>n = 45 |
| <b>Duration of surgery (minutes)</b>                     |                   |                   |                   |
| <i>Mean (SD)</i>                                         | 167 (73)          | 162 (66)          | 234 (115)         |
| <i>Median (Q1, Q3)</i>                                   | 155 (115, 200)    | 150 (110, 195)    | 215 (150, 285)    |
| <b>Disease duration (years)</b>                          |                   |                   |                   |
| <i>Mean (SD)</i>                                         | 11 (9)            | 11 (9)            | 17 (10)           |
| <i>Median (Q1, Q3)</i>                                   | 10 (4, 17)        | 9 (3, 17)         | 16 (10, 20)       |
| Unknown                                                  | 1                 | 1                 | 0                 |
| <b>Gender, n (%)</b>                                     |                   |                   |                   |
| Female                                                   | 298 (46%)         | 282 (47%)         | 16 (36%)          |
| Male                                                     | 343 (54%)         | 314 (53%)         | 29 (64%)          |
| <b>Smoker at surgery, n (%)</b>                          |                   |                   |                   |
| Yes                                                      | 274 (43%)         | 258 (43%)         | 16 (36%)          |
| No                                                       | 367 (57%)         | 338 (57%)         | 29 (64%)          |
| <b>Age</b>                                               |                   |                   |                   |
| <i>Mean (SD)</i>                                         | 38 (13)           | 38 (13)           | 41 (13)           |
| <i>Median (Q1, Q3)</i>                                   | 37 (28, 47)       | 37 (28, 47)       | 38 (29, 47)       |
| <b>CDC, n (%)</b>                                        |                   |                   |                   |
| Minor                                                    | 596 (93%)         |                   |                   |
| Major                                                    | 45 (7.0%)         |                   |                   |
| <b>BMI</b>                                               |                   |                   |                   |
| <i>Mean (SD)</i>                                         | 23.1 (22.9)       | 23.2 (23.7)       | 21.9 (4.1)        |
| <i>Median (Q1, Q3)</i>                                   | 21.2 (18.9, 24.2) | 21.2 (18.9, 24.3) | 21.1 (18.6, 23.5) |
| <b>Duration of surgery (minutes)</b>                     |                   |                   |                   |
| <i>Mean (SD)</i>                                         | 167 (73)          | 162 (66)          | 234 (115)         |
| <i>Median (Q1, Q3)</i>                                   | 155 (115, 200)    | 150 (110, 195)    | 215 (150, 285)    |
| <b>Previous surgeries, n (%)</b>                         |                   |                   |                   |
| <i>Mean (SD)</i>                                         | 0.76 (1.17)       | 0.71 (1.06)       | 1.36 (2.05)       |
| <i>Median (Q1, Q3)</i>                                   | 0.00 (0.00, 1.00) | 0.00 (0.00, 1.00) | 1.00 (0.00, 2.00) |
| <b>Surgical recurrence, n (%)</b>                        |                   |                   |                   |
| Yes                                                      | 121 (19%)         | 112 (19%)         | 9 (20%)           |
| No                                                       | 520 (81%)         | 484 (81%)         | 36 (80%)          |
| <b>Surgical approach, n (%)</b>                          |                   |                   |                   |
| Laparoscopic                                             | 270 (42%)         | 261 (44%)         | 9 (20%)           |
| Open                                                     | 371 (58%)         | 335 (56%)         | 36 (80%)          |
| <b>Anastomoses, n (%)</b>                                |                   |                   |                   |
| <i>Mean (SD)</i>                                         | 0.99 (0.42)       | 1.00 (0.42)       | 0.84 (0.42)       |
| <i>Median (Q1, Q3)</i>                                   | 1.00 (1.00, 1.00) | 1.00 (1.00, 1.00) | 1.00 (1.00, 1.00) |
| <b>Stoma, n (%)</b>                                      |                   |                   |                   |
| 1                                                        | 565 (88%)         | 531 (89%)         | 34 (76%)          |
| 2                                                        | 74 (12%)          | 63 (11%)          | 11 (24%)          |
| 3                                                        | 2 (0.3%)          | 2 (0.3%)          | 0 (0%)            |
| <b>Microscopically positive resection margins, n (%)</b> |                   |                   |                   |
| Yes                                                      | 371 (58%)         | 351 (59%)         | 20 (44%)          |
| No                                                       | 270 (42%)         | 245 (41%)         | 25 (56%)          |
| <b>Ileocolic resection, n (%)</b>                        |                   |                   |                   |
| Yes                                                      | 397 (62%)         | 379 (64%)         | 18 (40%)          |
| No                                                       | 244 (38%)         | 217 (36%)         | 27 (60%)          |
| <b>Right hemicolectomy, n (%)</b>                        |                   |                   |                   |
| Yes                                                      | 82 (13%)          | 78 (13%)          | 4 (8.9%)          |
| No                                                       | 559 (87%)         | 518 (87%)         | 41 (91%)          |
| <b>Isolated colonic resection, n (%)</b>                 |                   |                   |                   |
| Yes                                                      | 118 (18%)         | 106 (18%)         | 12 (27%)          |
| No                                                       | 523 (82%)         | 490 (82%)         | 33 (73%)          |
| <b>Anastomotic resection, n (%)</b>                      |                   |                   |                   |
| Yes                                                      | 137 (21%)         | 121 (20%)         | 16 (36%)          |
| No                                                       | 504 (79%)         | 475 (80%)         | 29 (64%)          |
| <b>Strictureplasty, n (%)</b>                            |                   |                   |                   |
| <i>Mean (SD)</i>                                         | 0.25 (0.80)       | 0.24 (0.78)       | 0.47 (1.01)       |
| <i>Median (Q1, Q3)</i>                                   | 0.00 (0.00, 0.00) | 0.00 (0.00, 0.00) | 0.00 (0.00, 0.00) |

Supplementary table 2. Descriptive overview of patient characteristics, stratified by complications (classified by CDC)

Abbreviations: BMI body mass index; CDC Clavien Dindo classification
