# Supplementary material
Source: Research Square preprint supplement (doi:10.21203/rs.3.rs-8927304/v1)
Supplement: Supplementary file 4 [file b8edb82eb66816af2874e070.pdf]

## LOGISTIC REGRESSION FOR MAJOR POSTOPERATIVE COMPLICATIONS

| VARIABLE                                   | UNIVARIATE BINARY REGRESSION |             |        | MULTIVARIATE BINARY REGRESSION |             |        |
|--------------------------------------------|------------------------------|-------------|--------|--------------------------------|-------------|--------|
|                                            | OR                           | 95% CI      | p      | OR                             | 95% CI      | p      |
| Duration of surgery (minutes)              | 1.010                        | 1.007-1.014 | <0.001 | 1.009                          | 1.005-1.013 | <0.001 |
| Number of anastomoses                      | 0.403                        | 0.198-0.836 | 0.013  | 0.464                          | 0.190-1.041 | 0.078  |
| Stoma (number)                             | 2.379                        | 1.140-4.617 | 0.014  | 0.749                          | 0.266-1.881 | 0.560  |
| Disease duration (years)                   | 1.059                        | 1.028-1.090 | <0.001 | 1.019                          | 0.982-1.056 | 0.312  |
| Previous surgeries (number)                | 1.364                        | 1.125-1.642 | 0.001  | 0.948                          | 0.728-1.213 | 0.676  |
| Microscopically positive resection margins | 1.791                        | 0.975-3.329 | 0.061  | 1.371                          | 0.704-2.678 | 0.352  |
| Ileocolic resection (None)                 | 2.620                        | 1.420-4.942 | 0.002  | 1.244                          | 0.603-2.580 | 0.554  |
| Anastomotic resection                      | 0.462                        | 0.246-0.896 | 0.018  | 0.512                          | 0.236-1.127 | 0.091  |
| Surgical approach (Open)                   | 3.116                        | 1.539-6.996 | 0.003  | 1.549                          | 0.681-3.778 | 0.312  |
| Smoking status (non-smoker)                | 1.384                        | 0.745-2.658 | 0.314  | 1.176                          | 0.595-2.388 | 0.645  |
| Age (years)                                | 1.016                        | 0.993-1.038 | 0.170  |                                |             |        |
| Strictureplasty                            | 1.279                        | 0.942-1.646 | 0.075  |                                |             |        |
| BMI                                        | 0.994                        | 0.934-1.008 | 0.743  |                                |             |        |
| TNFi (post operation)                      | 0.608                        | 0.275-1.539 | 0.250  |                                |             |        |
| Gender (Male)                              | 1.628                        | 0.877-3.126 | 0.130  |                                |             |        |
| Surgical recurrence (No)                   | 1.080                        | 0.477-2.214 | 0.842  |                                |             |        |
| Right hemicolectomy (None)                 | 1.543                        | 0.602-5.240 | 0.420  |                                |             |        |
| Colonic resection                          | 0.595                        | 0.305-1.235 | 0.142  |                                |             |        |

**Table 2.** Univariable and multivariable binary logistic regression analysis evaluating factors impacting on occurrence of major complications.

*Abbreviations:* BMI body mass index; CI Confidence interval; OR odds ratio; TNFi tumor necrosis factor alpha inhibitor
