# Supplementary material
Source: Research Square preprint supplement (doi:10.21203/rs.3.rs-8927304/v1)
Supplement: Supplementary file 5 [file f2b1151d8901266f8d2a96e5.pdf]

**MONTREAL CLASSIFICATION (n=641)**

|                        |             |
|------------------------|-------------|
| <b>Montreal A1 (%)</b> | 85 (13.2%)  |
| <b>Montreal A2 (%)</b> | 469 (73.2%) |
| <b>Montreal A3 (%)</b> | 87 (13.6%)  |
| <b>Montreal L1 (%)</b> | 254 (39.6%) |
| <b>Montreal L2 (%)</b> | 136 (21.2%) |
| <b>Montreal L3 (%)</b> | 303 (47.3%) |
| <b>Montreal L4 (%)</b> | 46 (7.2%)   |
| <b>Montreal B1 (%)</b> | 11 (1.7%)   |
| <b>Montreal B2 (%)</b> | 528 (82.4%) |
| <b>Montreal B3 (%)</b> | 414 (64.6%) |
| <b>Montreal p (%)</b>  | 74 (11.5%)  |

**POSTOPERATIVE COMPLICATIONS AS PER CLAVIEN-DINDO CLASSIFICATION (n=641)**

|                |             |
|----------------|-------------|
| <b>0+1 (%)</b> | 507 (79.1%) |
| <b>2 (%)</b>   | 89 (13.9%)  |
| <b>3a (%)</b>  | 8 (1.2%)    |
| <b>3b (%)</b>  | 29 (4.5%)   |
| <b>4a (%)</b>  | 6 (0.9%)    |
| <b>5 (%)</b>   | 2 (0.3%)    |

**Supplementary Table 1.** Montreal Classification and postoperative complications according to the Clavien-Dindo-Classification. Mean±SD
