# Supplementary material
Source: Research Square preprint supplement (doi:10.21203/rs.3.rs-8927304/v1)
Supplement: Supplementary file 6 [file f470b7d60f6de42729e8d0c0.pdf]

## COX REGRESSION FOR SURGICAL RECURRENCE

| VARIABLE                                   | UNIVARIATE REGRESSION |             |              | MULTIVARIATE REGRESSION |             |              |
|--------------------------------------------|-----------------------|-------------|--------------|-------------------------|-------------|--------------|
|                                            | HR                    | 95% CI      | p            | HR                      | 95% CI      | p            |
| Duration of surgery (minutes)              | 1.002                 | 0.999-1.004 | 0.136        | 1.002                   | 0.999-1.004 | 0.222        |
| Surgical approach (Open)                   | 1.665                 | 1.126-2.461 | <b>0.011</b> | 1.756                   | 1.148-2.687 | <b>0.009</b> |
| BMI                                        | 0.991                 | 0.946-1.019 | 0.527        | 0.993                   | 0.971-1.017 | 0.578        |
| Gender (Male)                              | 0.669                 | 0.462-0.970 | <b>0.034</b> | 0.613                   | 0.419-0.898 | <b>0.012</b> |
| Smoking status (non-smoker)                | 0.663                 | 0.458-0.962 | <b>0.030</b> | 0.659                   | 0.452-0.959 | <b>0.029</b> |
| Microscopically positive resection margins | 1.718                 | 1.187-2.489 | <b>0.004</b> | 1.574                   | 1.075-2.305 | <b>0.020</b> |
| Ileocolic resection (None)                 | 0.951                 | 0.646-1.399 | 0.798        | 0.627                   | 0.358-1.098 | 0.103        |
| Right hemicolectomy (None)                 | 0.662                 | 0.404-1.084 | 0.101        | 0.498                   | 0.256-0.972 | <b>0.041</b> |
| Anastomotic resection                      | 0.900                 | 0.584-1.388 | 0.634        | 0.878                   | 0.503-1.534 | 0.647        |
| Isolated colonic resection                 | 1.142                 | 0.690-1.890 | 0.606        | 1.208                   | 0.640-2.280 | 0.560        |
| Age at time of surgery (years)             | 0.995                 | 0.981-1.010 | 0.517        |                         |             |              |
| Number of anastomoses                      | 0.908                 | 0.558-1.477 | 0.697        |                         |             |              |
| Strictureplasty                            | 1.097                 | 0.907-1.327 | 0.339        |                         |             |              |
| Major complication                         | 1.216                 | 0.615-2.402 | 0.574        |                         |             |              |
| Disease duration (years)                   | 1.006                 | 0.986-1.027 | 0.554        |                         |             |              |
| Previous surgeries                         | 1.021                 | 0.869-1.200 | 0.800        |                         |             |              |
| TNFi (post operation)                      | 1.246                 | 0.576-2.692 | 0.577        |                         |             |              |

**Table 3.** Cox proportional hazards models of time until surgical recurrence.

*Abbreviations:* BMI body mass index; CI Confidence interval; HR hazard ratio; TNFi tumor necrosis factor alpha inhibitor
